# Supplementary material
Source: publisher figshare collection journal article supplement (https://gsajournals.figshare.com/articles/dataset/_/5970946)
Supplement: Supplementary file 1 [file 1]

CGTTCGTCAATGTATTTTCAGAAGGCCTT -2,106  
GGATTTTTTCCGTTTTCATCTctgaaattcaggaaaaatcgataaaatttcaagatttggagaatttttcttcaaaaaaaaggg -2,023  
taaatttgtgattttttaaacaatttttttatgtaaaattgcagaaaaatcaataaaattcccgattttgtgcaactgttttg -1,940  
ttcaaaaaaggttaatttcagatttttgaaacatttttttgaaaaatttgagaaaaatcaattaaatttcaggttttgataa -1,857  
ttgttttcttcaaaaaaaaggggtgaattttcgattttttgaatttttttgtaaaattgcagaaaaatcgataaaattt -1,774  
caagatttgagcatttttcttcaaaaaatgttaactttctgatttttcaaatatttttcttgtaaaatttgagaaaaatcga -1,691  
taaaatttcacgtacctattttcttgcgaactattttcttgcagaaaaatttcttaaaactcttaaaaaagcttttttttttagtt -1,608  
tttttagctaaattttttgaaatttctgagctttttgaatattttaccagataaaatttttcggtcgaaataccagattttga -1,525  
gcactttttgtcttcaaaaaatcttcaaaaaatccagtaaaatcggtaaacttcaagcttttttgatgaaaaatttcaataaatt -1,442  
ctgacatttttcagaaaaaacaagcgatttttgttgaaaaatagtcaaaaatttggtgatttttcgtagctttttgacaatttgcag -1,359  
tcatttttcagatagaaaaatcaatatataaaagggtgaatttccacttttttgataaaaaatgcactaatttttgagagttttt -1,276  
ttgaaaaatagtcgaaatatgctgacttttcggagtttttggaacaatttccagtcatttttgcgcgactttgcaaaaagaaaacca -1,193  
gagttttgctgaaaaatgtgcaatttttgcatacttaacacacaaaaaccatgaaaaatttgatgattttccagtcatttttcagc -1,110  
aaaaaaaaaatcatttttctaactgttttcaccgaaaaaacaattatttttcaggtaacgcacTGGTTTCCTTCAGGATTTTCAGA -1,027  
CTTTCCTCTTCTTTCATCGTAAACTCGTGTTCCGGCGACTTCTCTCAGTAGCTTTAGCTTATAAGCGTCCGGCGAAGTGGC -944  
CAACTCGTTGATTTTTCCCTGTTTAAACGATGTAATACGGGTTTGAGCGAGAAAAATCCGGCGGATTCCATGAGATTTACCACct -861  
gaaattgaggaaaaatcgataaatctcgaggttttccacagctggaatacCTCGGCACGTGGCACCATTTTATTATCAATGTA -778  
ATATTGATCCTTTTTCTTTCCAACCTTGACGAACAATCTTCACTTCTGAATTTTCAAACGCCATTAGACGCTTTTCCGAGTTGT -695  
CAAAGGTGATTTTCGACACGAGCGTGGGCGACTTTCGGTCCGGTACTCTCGTGAAGCAGACCAAGACGTTGTTCTTCTTTCAA -612  
TGAGCATATTCATCGAAAGAACGAATTGAATCGctgaaaaattgacatttttcagcttttccgcagaaaaatcatgcggctaac -529  
CATGGAAGAAATTTGGATTTTCCCGATCCATTTCGTCCGACGACGAGTTCGAGCGTGGACTGAAGCCCGACACATTGGTGTG -446  
TCTTTGTAGCTTCGAAAGCCGGTGATTCTCACctgaaaaatagggaaaaaatcgatgaaaaaacttgggaaaaactcacTTCTTTGA -363  
TCTTCATcggtttattgcatcaagtgatgggatgttgactgaaacatcgataatatagatgagaaaaatcgagaaatttaagtc -280  
aaaaaaaaaacttttgaatgaggaaaaatcgatggaaatcgcaaaaaaactgaaaaatcagcaaaaaataaatttcaaattcaaag -197  
cgaagaattcgcgggcgcgacccgggactagaaatccccactcggccaccctgtgtgtactcctctcgggacaaggatatttcg -114  
aaaaatgagggttttttccaaataaaaaacgtgtttatttctcggaaaaaatactagaaaaaccacggaaaaaacgtgtctaaaaacaaaa -31

eb34 ATG M to ATA I

M N G V A G E S P S Y 11

aactaaagcagaataacaaaaaaattatttatttcaattatttctcacaataATGAACGGAGTAGCTGGCGAATCGCCGAGCTA 53

eb41 GGC G to GAC D

D E Y L T Y F T P G D R I L I S E N H P N H A Q R L N 38

CGACGAGTACCTGACGTATTTACACCCGGGCGATCGAATTCTGATATCGGAAAAATCATCCAAATCATGCACAACGCCTCAATT 136

S Y N N V A W T K T H L A 51

CGTACAATAATGTTGCGTGGACGAAGACACATTTGGCTgtgagtggcagaaaaagaaaaaaatgctgaaatctgaaattttttg 219

L L G H I G Y I E S I N E H 65

ctgagaatctcttcaaaaacaggcaaaatcttcaacatttttcagCTTCTCGGTCACATTGGCTATATCGAGAGCATCAACGAGCA 302

R H T A N V R V Y Y A V P Q N P E L 83

CCGGCACACTGCAAAATGTTCCGGGTTTACTACGCAGTTCCGCAAAATCCAGAGCTTgtaagctgattttttgaagattttgtgt 385

aaaatgtgtgatttttcggaatctagcgatctttttgtactttttccattgaaaaatcggaaaaaaaagtttaaaattgctt 468

ggatactaccgtaatcgtttaaggcgcacacatttttactgatcgcgcaggagaagtattgcgaaagtggcgtgcgtcttt 551

aaaaggctactgtaatttttgattttcaatatcgaaatttttaaatgaaaattgggtgataacggtacagaaaactgaaatcttc 634

attgaagatacttaaaaacttttctgaatttttttgatttcaagcttttcagaggtaaacactgaaaaaaagagcctttttccgaa 717

F K L S T E W P L D A L E F P Q C 100

tttttcatcccaaattttaaaattttaatttttcagTTCAAGCTCTCTACCGAATGGCCGCTGGACGCGTTTGGAAATTCCTTCAATG 800

I D H S K G D L V A I T R G D P E K T T I G I V A T K 127

TATAGATCATTTCAAAGGTGATCTCGTTGCAATAACCCGCGGAGATCCGGAAAAACGACAATCGGAATAGTGGCAACGAAGC 883

E P L N L G G I P K H L V Q L K S A S N P T I T R E I Q 155

AACCATTGAATTTAGGTGGAATTTCCGAAGCATTTGGTTCAACTGAAAAAGCGCCTCGAATCCGACGATTACCCGGGAGATTTCAG 966

V A V N A N T G W T D E R R D I F L C P V Y S G P R L S 183

GTGGCGGTTAATGCGAATACGGGATGGACTGATGAGAGACGGGATATCTTTTTGTGTCCGGTTTATTCCGGGTCCCCGATTGTC 1,049

M I A R D N N E P S V H T Y K gk936708 g to a splice donor mutation 198

AATGATTGCTAGAGATAATAATGAGCCGTCGGTTCATACTTATAAGgtagtaacttcaggcatgtctgcctccaaaactgcc 1,132

tgcttacacgcttatctgattatgtgcctacctagttgcctactatcgaatagcctgtcaaatgtgtgtctgatgtgaaaa 1,215

tgctgaaaaatgcgtccgcataaaagcttgtctgtctacatatgtgctgattgttcataggtaagcttacaaaacctacatacc 1,298

tacatgcctacttgcttacacgcctgcctccgcgaactacctgcttgttttttctgccttcctacatgtttgcctgaaaaatg 1,381

cgtctgcataaaagcctgtctgtctacatatgtgctgctggtccataggtcagcttacatgcctacatgcctacctgcctatc 1,464

H T I H G Y T P D T L M 210  
 tgcctacctacctacatgcctacctgaaagataaatcgatttttttcagCACACAATCCACGGCTACACCCCGACACCTTAAT 1,547  
 eb36 GCG A to ACG T  
 Q V I A N W G E D A L S Y A L L V E S I R S D P Q Q V 237  
 GCAAGTGATCGCGAATTGGGGTGAAGACGCGCTGAGCTATGCGCTTCTCGTCGAATCGATCCGATCGGATCCGCAACAAGTTC 1,630  
 hc54 CTT L to TTT F  
 R T L F D G Q L P L F R A V A D D L R N V V V M L V A L 265  
 GGACCCTTTTCGACGGTCAACTGCCACTTTTCCGTGCTGTCGCCGATGATCTACGGAATGTTGTTGTGATGCTTGTGCGCGTTG 1,713  
 gk587388 GGT G to AAT S  
 G A D R T A R D S E N R T I I H V A A E R 286  
 GGTGCAGATAGAACCGCCAGAGATTCCGAGAATCGAACTATCATTCATGTGGCTGCGGAGAGgtgggaaatcgtaaaaaaatc 1,796  
 eb35 ATG M to ATA I, eb42 CTG L to CAG Q  
 G L D K M L D T V M L L L P 300  
 gatttaaaaaaaaaaattaaaaaaaaatcaataattcttgcagAGGTCTTGACAAAATGCTGGATACTGTAATGCTTCTTCTCCCAA 1,879  
 K D I N S Q A A N G L T P L H L A A R H A H A A C I D R 328  
 AAGACATCAATTCACAAGCGGCCAACGGTCTAACACCGCTTCATTTGGCCGCCCGTCACGCCACGCAGCTTGTATCGATCGG 1,962  
 L L G T S T C I P C V P N N F G D T L L H E V C R L P E 356  
 CTTCTCGGTACGAGTACTTGTATTCCGTGTGTTCCGAACAATTTTGGCGACACACTTTTGCATGAGGTGTGCCGGCTGCCAGA 2,045  
 S S N K K A 362  
 GTCTTCGAATAAGgtttgtgttattgatttttccgaaaactgaccagaaaatcgataatcgctaaaaacaattttcagAAAGCGG 2,128  
 A I S R I L T N T R A N I H H V N N S N M T P I Q I A I 390  
 CAATAAGTAGAATTCGACAAATACTCGTGCGAACATTCATCACGTGAACAATAGCAATATGACACCCATCCAAATTCGAATT 2,211  
 M S G H V S T V E Q L L L 403  
 ATGAGTGGTCATGTCAGgtaaaaacctctattagaagtgcaccacccccctccaacattttcagCACCGTCGAGCAGCTTCTCCT 2,294  
 L R A S Y R N T T S K T G M S A L H F A A A S G H A N 430  
 GTTGCGTGCCTCCTACCGTAATACCACCTCGAAAACCTGGAATGAGCGCATTCGATTTTGCCGCTGCCTCTGGCCATGCGAATG 2,377  
 eb37 g to a splice donor mutation; a downstream gt splice donor frameshifts the  
 coding sequence, adding 9 novel amino acids followed by a premature stop codon \*  
 V V N K L I S I 437  
 TTGTCAATAAACTTATTTCCgtaggtgaaaaaaattagtagtgttggtggccgaggtttatgcaaaaactcggccacgtagtt 2,460  
 ttttaggatttttttgccgaaaaataatgaatttaagatcaaaaattttttctcgaaaaatttttaatttttcgccaaaaattttttt 2,543  
 A W P R S P P S \*  
 L G L E V H R R D K F G 449  
 ccagaaatttgaattttccgacaactttttttaattatttttcttcagCTTGCCCTAGAAAGTCCACCGTCGTGACAAGTTCCGTT 2,626  
 R G V L H Y A L E K W T G E A E K D C N R L A A I Q A L 477  
 CGCGGAGTACTCCACTACGCCCTCGAAAAATGGACAGGAGAAAGCGGAAAAAGACTGTAATCGGCTTGACGCAATTCAGGCTCT 2,709  
 V K A G A P S N I I D L N G Q T P V F Q L I R E M L S 504  
 CGTTAAAGCCGGCGCTCCATCGAATATTATCGATTGTAATGGACAGACACCGGTTTTCAGTTGATTTCGTGAAATGTTGAGCA 2,792  
 N S E Q Y P A S L V P V C A Q L V R T N L N L D E M A S 532  
 ATTCGGAGCAATATCCGGCGTGTGTTGTTCCGGTTTGTGCTCAACTTGTTCGTACGAACCTGAATCTTGATGAGATGGCAAGC 2,875  
 R L R P M W Q L A T I C F L V A N G A D L N V K 556  
 CGACTTCGTCCGATGTGGCAACTTGCCACTATTTGCTTTTGGTTGCTAATGGAGCGGATTTGAATGTCAAgttggtctatttt 2,958  
 ttttttaaagaaaaatcgataattttttctctttttctggtgaaaaatcgatattcttcaagaaagtcaatatatttcggataaaaaatcg 3,041  
 K I N N V  
 atatttaaaaaaaaaaatcgatttctctagaaaaaatatgtttttcgacaaaaatcgatagttttcagaaaaatcaataatgtcc 3,124  
 eb39 g to a splice acceptor mutation; an upstream ag splice donor causes a novel  
 in-frame 8 amino acid insertion in an otherwise wild type MIB-1 protein  
 P F K D R R G M T V M D L C E E S S F R S I I V H I A Q 581  
 ctttcagAGATCGCAGAGGGATGACCGTGATGGATTGTTGTCGAAGAATCATCATTTAGATCGATTATCGTTTCATATTGCACAG 3,207  
 T K Q R 585  
 ACTAAGCAGAGgttgggattttcagtgatggccgcccgaatgagaaaaactcggccaccaattgatttttcgattttttttttga 3,290  
 aaagtttctgaaattgatgcgtaagggtactatcaaatatagagaatcaacaaacaaaaaaatgggtggccgagtttccgaa 3,373  
 Q V M P M M M A M S E D K F D S 601  
 aaaatttcggccatgtcgcaaaaactcaatttcagACAGGTGATGCCGATGATGATGGCGATGAGTGAGGATAAATTCGACTCGA 3,456  
 T E V T M C T F S C L N S V A T V K L D P C G H R V A C 629  
 CAGAAGTAACAATGTGCACATTTTCATGTCTCAATTCGGTTGCCACTGTCAAAATGGACCCGTGCGGTTCATCGGGTTCGCTTGT 3,539  
 V D C T E K V A I R R C P V C R Q F I N E A H D Q 654  
 GTCGATTGTACGGAGAAAGTGGAATCCGCCGATGCCAGTGTGTCGTCAATTTATCAACGAGGCTCATGATCAAGgtattttg 3,622

```

cgaggatttacggggtgtggcctagaaataccttttttagagttttctaggccacgttggcaatttgatcaattttgttttcgt 3,705
                                     D G K P V Q I G 662
ggaaaatcgattatcgatgtatcgatttttctctgtatactaaatatcgatgtttaaacagACGGAAAGCCAGTTCAAATCGG 3,788
S R C H E P S D G D R Q Q V S A E V R K Q I A D D A A 689
CTCCCCGTGCCATGAACCATCCGATGGCGATCGTCAACAAGTTTCGGCAGAAGTTTCGCAAACAAATCGCCGACGATGCGGCGA 3,871
R E A K I E V E R E K Q N E L N Q L R K R L E Q L E L E 717
GAGAGGCGAAAAATCGAAGTGGAAACGTGAAAAGCAGAATGAGTTGAATCAACTGAGAAAAACGTTTGGAGCAGCTCGAGTTGGAG 3,954
eb33 TGC C to TAC Y
T N C A I C M D L K I A 729
ACGAACTGCGCGATTTGTATGGATTTGAAGATTGCGgtgagtatggctttaacaaaaaatcaataaattatcgattttttga 4,037
V V F N C G H T A C V D C A D K L K K Q C H 751
aaaattaaatatttttcagGTTGTATTTAATTGTGGACATACGGCTTGTGTGGATTGTGCCGATAAACTGAAGAAGCAATGTCA 4,120
I C R K T I E T M Q P I Y S 765
CATCTGCAGAAAGACTATCGAGACGATGCAGCCGATCTACTCGtgaatatcaatttattgcttttgattgtgtataactccatt 4,203
tctgtgtaaataaataagattttattgagaaataaagggtttttaactg 4,252

```

**Supplemental Figure 1:** The *mib-1* gene, protein and various sequence features:

*mib-1* (Y47D3A.22) exons are shaded in red and include the empirically determined *mib-1* transcription start (SMART II kit, Clontech), defined here as #1 in the sequence numbering scheme. Amino acids are numbered in *italics* and show the wild type protein sequence.

Introns are in lower case and have no shading

*smc-3* (Y47D3A.26a) exons are shaded in magenta but coding is on the opposite strand from *mib-1*. Only part of the *smc-3* gene is shown, including the entire region used for the 5'UTR/promoter fusion described in Figure 8.

Translation start codons are ATG text at 22 for *mib-1* and -356 for *smc-3*

UTR sequence as defined by cDNA's described in Wormbase appears in gray text. At the 5' end, the longest cDNA is PE\_SS\_GG2740#FAF3E5. This is considerably longer than the empirically determined 5'transcription start for unknown reasons.

ct antisense to *smc-3* outtron acceptor for SL1

g (at -145 ) and T (at 968), respectively, marks the 5' and 3' ends of the 1,113 bp region deleted in the *mib-1*(*eb154*) mutation.

Point mutations are indicated in aqua shading

The effects of the *mib-1*(*eb37*) and *mib-1*(*eb39*) splicing mutations on the protein sequence are indicated in yellow shading; these highlighted residues are not included in amino acid numbering.

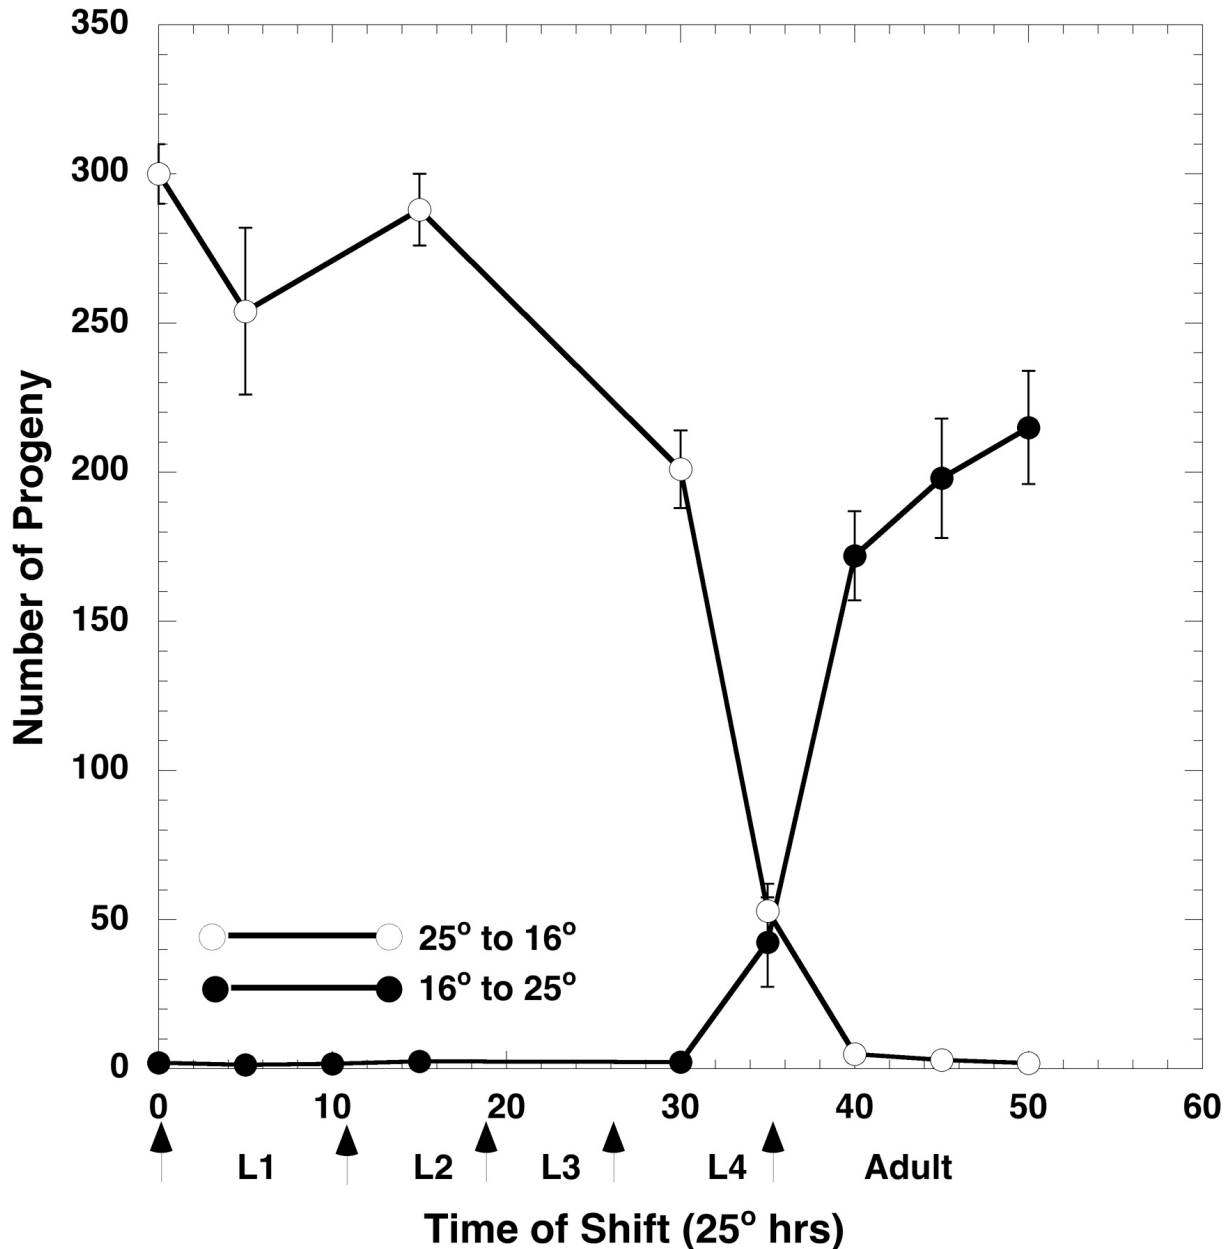

**Supplemental Figure 2:** TSP curves for *mib-1(eb154)*. *mib-1(eb154)* hermaphrodites were shifted from permissive (16°) to restrictive (25°) temperature, or vice versa, at intervals throughout development to determine when the MIB-1 protein is required for fertility (the temperature-sensitive period, or TSP). The mean number of progeny produced by 9-14 *mib-1(eb154)* hermaphrodites is plotted against their age at temperature shift, in 25° hours since hatch. Error bars are standard error of the mean. Data from upshifts (16° to 25°) and downshifts (25° to 16°) are plotted separately. Progeny counts plotted at 50 hrs are control values from animals that were not shifted. The approximate positions of life cycle stages are indicated below the X axis.

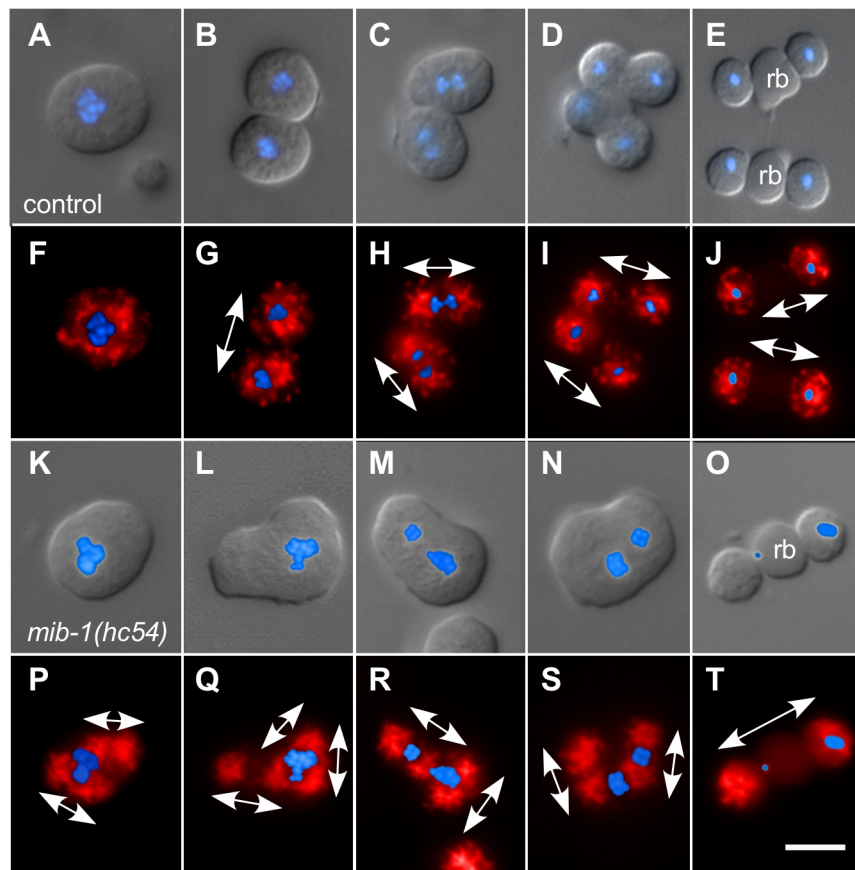

**Figure S3: Spermatogenesis in live cells.** Live *him-5* (wild type control; A-J) or *mib-1(hc54); him-5* (K-T), where DNA appears in blue and mitochondria are shown in red. Double-headed arrows indicate the presumptive cell division planes. (A, F) a primary spermatocyte with centrally located chromosomes surrounded by mitochondria; (B, G) secondary spermatocytes showing a well-ordered division plane and mitochondria concentrated around the chromosomes; (C, H) dividing secondary spermatocytes showing mitochondria positioned between the spindle poles and the plasma membrane; (D, I) dividing secondary spermatocytes at a later stage than (C, H) showing that mitochondria surround the nucleus; (E, J) as spermatids become distinct from the residual body (rb), the mitochondria concentrate around the condensed nucleus; (K, P) a *mib-1* spermatocyte with two division planes has both sets of chromosomes in one location; (L, Q) a *mib-1* spermatocyte that has three division planes but all of its chromosomes in one location; (M, R) a *mib-1* spermatocyte that has two division planes 90° to each other with chromosomes centrally located (upper left) or off-center (lower right) relative to the mitochondria; (N, S) a *mib-1* spermatocyte with two division planes, one with centrally located chromosomes (right) and one with improperly positioned chromosomes (left; O, T) two spermatids, one (right) with and one (left) without a nucleus, separating from the residual body (rb) with a small DNA mass near the nucleus-free spermatid.

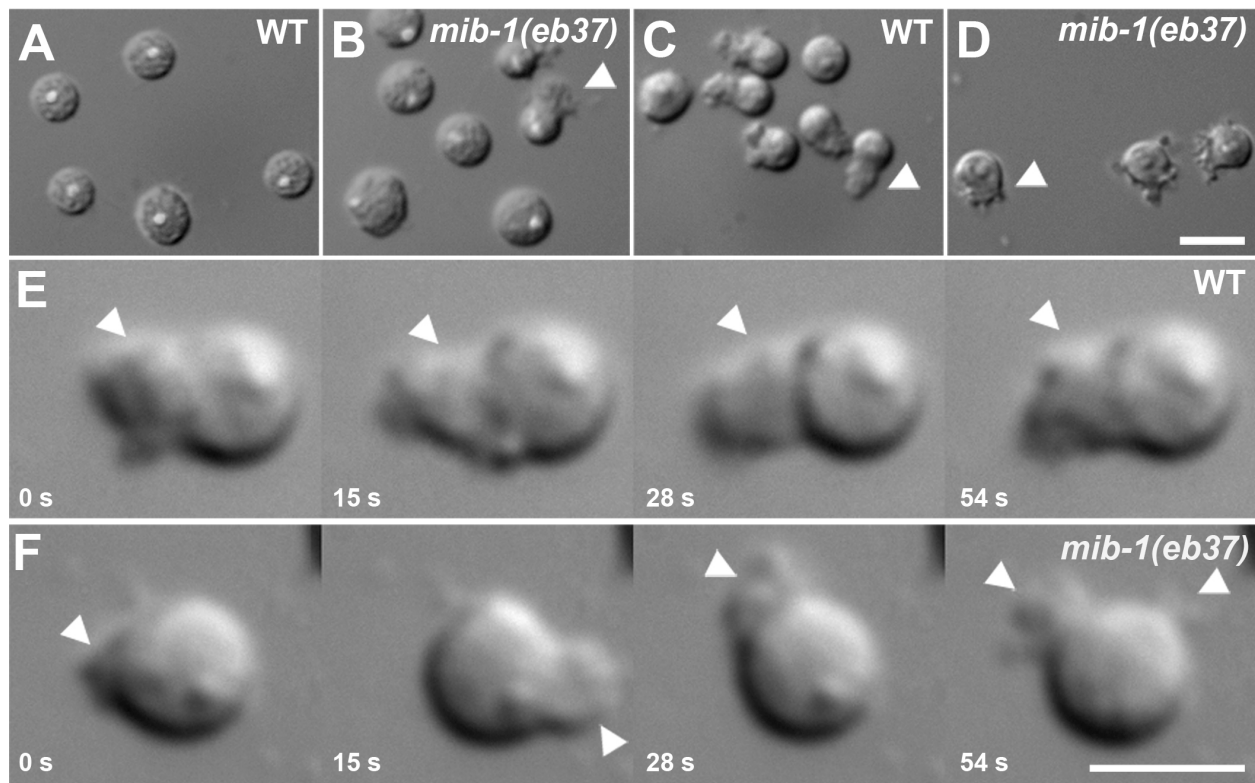

**Figure S4: Wild type and *mib-1(eb37)* male-derived sperm.** (A) Control (*him-5*) spermatids are round and have a nucleus (white dot) that is usually located centrally; (B) *mib-1(eb37)*; *him-5* spermatids have nuclei (white dot) that are frequently off-center. One spontaneously activated spermatozoon with a pseudopod (arrowhead) is present. (C and D) DIC micrographs of dissected male sperm activated *in vitro* with Pronase. (C) Control (*him-5*) spermatozoa each extend a single pseudopod (arrowhead) that is approximately equal in length to the cell body; (D) *mib-1(eb37)*; *him-5* spermatozoa extend short, abnormal pseudopods. (E and F) Frame-grabbed images from movies of immobilized male-derived sperm that have been activated with Pronase. The time (in seconds, s) is indicated in the left corner of each frame. (E) A control (*him-5*) spermatozoon has a single pseudopod (arrowheads) that maintains a stable position relative to the cell body (frame grabbed from supplemental movie S1); (F) A *mib-1(eb37)*; *him-5* spermatozoon extends a short, unstable pseudopod (arrowheads) that rapidly changes position. In the last frame, two regions extend a pseudopod (frame grabbed from supplemental movie S3). The scale bars are 5 μm and the one in D applies to A-D while the one in F applies to E and F.



which was possible because there is high MIB-1 homology among these species. Identical amino acids that are indicated by an “\*”, closely similar amino acids are indicated by a “:” and somewhat similar amino acids are indicated by a “.”. The original accession numbers are: NP\_499452 for *C. elegans* (Abbott et al., 1998), CAP32032.2 for *C. briggsae* (Stein et al., 2003), XP\_003104188.1 for *C. remanei* (unpublished, Washington University Genome Sequencing Center), EGT34718.1 for *C. brenneri* (unpublished, Washington University Genome Sequencing Center), Csp11.Scaffold628.g7302.t1 for *C. tropicalis* (from: <http://blast.caenorhabditis.org/#result>). The positions of nine mutations created in this study plus two from the Million Mutation Project that were partially evaluated are indicated (Thompson et al., 2013). X indicates the position of mutations that affect splice sites and alter or truncate the coding sequence (see supplemental Figure 1).

#### SUPPLEMENTAL REFERENCES

- Abbott, A., Abu-Threideh, J., Ainscough, R., Ahrens, C., Alexander, E., Ali, J., Ames, M., Anderson, K., Andrews, S., Angell, S., et al.** (1998). Genome sequence of the nematode *C. elegans*: a platform for investigating biology. *Science* **282**, 2012-2018.
- Sievers, F., Wilm, A., Dineen, D., Gibson, T. J., Karplus, K., Li, W., Lopez, R., McWilliam, H., Remmert, M., Soding, J., et al.** (2011). Fast, scalable generation of high-quality protein multiple sequence alignments using Clustal Omega. *Mol. Sys. Biol.* **7**, 539.
- Stein, L. D., Bao, Z., Blasiar, D., Blumenthal, T., Brent, M. R., Chen, N., Chinwalla, A., Clarke, L., Clee, C., Coghlan, A., et al.** (2003). The Genome Sequence of *Caenorhabditis briggsae*: A Platform for Comparative Genomics. *PLoS Biol* **1**, E45.
- Thompson, O., Edgley, M., Strasbourger, P., Flibotte, S., Ewing, B., Adair, R., Au, V., Chaudhry, I., Fernando, L., Hutter, H., et al.** (2013). The million mutation project: a new approach to genetics in *Caenorhabditis elegans*. *Genome Res* **23**, 1749-1762.



aaatcgatgaaaaacttgggaaaaactcacTCTTTGATCTTCATcggtttattgcatcaagtgatgggatgttgaCTgaaaca  
 tcgataatatagatgagaaaaatcgagaattttaagtcaaaaaaaactttttgaatgaggaaaaatcgatggaaatcgcaaaaaa  
 cactgaaaaatcagcaaaaaataaatttcaaattcaaagcgaagaatttcgcgggcgcgacccgggactagaaaatccccactcggc  
 antisense to HL45 primer  
 CACCCGtggtgtactccctctcggacaaggatatttcgaaaaatgaggggtttttccaaataaaaaacgtgttattctcggaaaaa -68  
 tactagaaaaaccacggaaaaacgtgtctaaaaacaaaaaaactaaagcagaataacaaaaaattatttaTTTcaattattttctca 16  
 M S K G E E L F T G V V P I L V E L D G D V N G H K  
 caaaaATGAGTAAAGGAGAAGAACTTTTCACTGGAGTTGTCCCAATTCTTGTGAATTAGATGGTGATGTTAATGGGCACAAA 21/78  
 F S V S G E G E G D A T Y G K L T L K F I C T T T G K L P  
 TTTTCTGTCTCAGTGGAGAGGGTGAAGGTGATGCAACATACGGAAAACTTACCCTTAAATTTATTTGCACTACTGGAAAACTACC 161  
 V P W P T L V T T F  
 TGTTCATGgtaagttttaaacatatataactaactaaccctgattattttaaatTTTcagCCAACACTTGTCACTACTTTTCT 244  
 C Y G V Q C F S R Y P D H M K Q H D F F K S A M P E G Y  
 GTTATGGTGTTCATGCTTCTCGAGATACCCAGATCATATGAAACAGCATGACTTTTTCAAGAGTGCCATGCCCGAAGGTTAT 327  
 V Q E R T I F F K D D G N Y K T  
 GTACAGGAAAGAACTATATTTTTCAAGATGACGGGAACACAAGACAGgtaagttttaaacagttcgggtactaactaaccata 410  
 R A E V K F E G D T L V N R I E L K G I D F  
 catattttaaatTTTcagGTGCTGAAGTCAAGTTTGAAGGTGATACCCTTGTTAATAGAATCGAGTTAAAAAGGTATTGATTTTA 493  
 K E A D G G N I L G H K L E Y N Y N S H N V Y I M A D K Q K  
 AAGAGATGGAACATTTCTTGGACACAAATTTGGAATACAACATAACTCACACAATGTATACATCATGGCAGACACAAAAG 576  
 N G I K V N F K I R H  
 AATGGAATCAAAGTTgtaagttttaaacatgattttactaactaactaatctgattttaaatTTTcagAACTTCAAAATTAGACA 659  
 N I E D G S V Q L A D H Y Q Q N T P I G D G P V L L P  
 CAACATTGAAGATGGAAGCGTTCAACTAGCAGACCATTATCAACAAAAATACTCCAATTGGCGATGGCCCTGTCTTTTACCAG 742  
 D N H Y L S T Q S A L S K D P N E K R D H M V L L E F V  
 ACAACCATTTACCTGTCCACACAATCTGCCCTTTTCGAAAGATCCCAACGAAAAGAGAGACCACATGGTCTCTTTGAGTTTGTA 825  
 T A A G I T H G M D E L Y K G G G M N G V A G E S P S Y  
 ACAGCTGCTGGGATTACACATGGCATGGACGAACATAACAAggaggcggaATGAACGGAGTAGCTGGCGAATCGCCGAGCTA 876/53  
 D E Y L T Y F T P G D R I L I S E N H P N H A Q R L N  
 CGACGAGTACCTGACGTATTTTCACACCGGGCGATCGAATTCTGATATCGGAAAAATCATCCAAATCATGCACAACGCCCTCAATT 136  
 S Y N N V A W T K T H L A  
 CGTACAATAATGTTGCGTGGACGAAGACACATTTGGCTgtgagtgccagaaaaagaaaaaaatgctgaaatctgaaattttttg 219  
 L L G H I G Y I E S I N E H  
 ctgagaatctctttcaaaacaggcaaatcttcaacattttcagCTTCTCGGTACATTTGGCTATATCGAGAGCATCAACGAGCA 302  
 R H T A N V R V Y Y A V P Q N P E L  
 CCGGCACACTGCAAAATGTTTCGGGTTTACTACGCAGTTCCCGCAAAATCCAGAGCTTgtaagctgattttttgaagattttgtgt 385  
 Aaaatgtgtgatttttcggaatctagcgatctttttgtacttttttccattgaaaaatcggaaaaaaaagtttaaatgtgt 468  
 Ggatactaccgtaatcgtttaaaggcgacacatttttactgatcgcgccaggagaagtattgcgaaagtggcgtgctgtcttt 551  
 Aaaaggctactgtaatttttgattttcaatatcgaatttttaaatgaaaattggttgataacggtacagaaactgaaatcttc 634  
 Attgaagatacttaaaaacttttctgaatttttttgatttcaagctttcagaggtaacactgaaaaaagagcctttttccgaa 717  
 F K L S T E W P L D A L E F P Q C  
 tttttcatcccaaattttaaatTTTcagTTCAAGCTCTCTACCGAATGGCCGCTGGACGCGTTGGAATTCCCTCAATG 800  
 I D H S K G D L V A I T R G D P E K T T I G I V A T K  
 TATAGATCATTTCAAAAGGTGATCTCGTTGCAATAACCCGCGGAGATCCGGAAAAAACGACAATCGGAATAGTGGCAACGAAGG 883  
 E P L N L G G I P K H L V Q L K S A S N P T I T R E I Q  
 AACCATTTGAATTTAGGTGGAATTCGAAGCATTTGGTTCAACTGAAAAGCGCCTCGAATCCGACGATTACCCGGGAGATTGAG 966  
 V A V N A N T G W T D E R R D I F L C P V Y S G P R L S  
 GTGGCGTTAATGCGAATACGGGATGGACTGATGAGAGACGGGATATCTTTTTGTGTCCGGTTTATTTCGGGTCCCCGATTGTC 1,049

**Supplemental Figure 6:** A *gfp::mib-1* gene fusion created by CRISPR genome engineering techniques.

Sequence features include:

*gfp* exon sequences are shaded in green and derived from pPD95.81 (Fire Lab Vector Kit, 1995). Three glycine codons link the 3' end of the *gfp* gene sequence to the start of *mib-1* coding sequence.

**G** (at -145) and **T** (at 968), respectively, marks the 5' and 3' ends of the 1,113 bp region deleted in the *mib-1(eb154)* mutation.

*mib-1* (Y47D3A.22) exons, shaded in red, include the empirically determined *mib-1* transcription start. Only part of the *mib-1* gene sequence is shown.

*smc-3* (Y47D3A.26a) exons are shaded in magenta and coding is on the opposite strand from *mib-1*. Only part of the *smc-3* gene is shown.

Translation start codons are in white text

Introns are in lower case and have no shading

Wild type *mib-1* had a **C** (at -150) was mutated to a **G** and a **G** (at 972) was mutated to a **T** (this silent mutation, like wild type, encodes alanine). These point mutations were introduced so that Cas9 would not cut the template during CRISPR-mediated insertion of *gfp* sequence into *mib-1(eb154)*.

**ct** antisense to *smc-3* outtron acceptor for SL1

**Supplemental Table 1**  
***mib-1* mutations**

| <b>Allele</b>        | <b>Mutagen</b> | <b>Screen</b> | <b>Tester<sup>1</sup></b> | <b>Mutation<sup>2</sup></b> | <b>Mutation type</b>                                                                                             |
|----------------------|----------------|---------------|---------------------------|-----------------------------|------------------------------------------------------------------------------------------------------------------|
| <i>mib-1(hc54)</i>   | 50 mM EMS      | F2            | NA                        | C 1657 T                    | L247F missense                                                                                                   |
| <i>mib-1(eb33)</i>   | 50 mM EMS      | F1            | <i>hc54</i>               | G 3962 A                    | C720Y missense                                                                                                   |
| <i>mib-1(eb34)</i>   | 50 mM EMS      | F1            | <i>hc54</i>               | G 24 A                      | M1I missense                                                                                                     |
| <i>mib-1(eb35)</i>   | 50 mM EMS      | F1            | <i>tDf7</i>               | G 1851 A                    | M291I missense                                                                                                   |
| <i>mib-1(eb36)</i>   | 50 mM EMS      | F1            | <i>hc54</i>               | G 1588 A                    | A224T missense                                                                                                   |
| <i>mib-1(eb37)</i>   | 50 mM EMS      | F1            | <i>hc54</i>               | G 2398 A                    | Cryptic splice donor used; encodes 437 of SPE-16 plus 9 novel amino acids followed by a premature nonsense codon |
| <i>mib-1(eb39)</i>   | 50 mM EMS      | F1            | <i>hc54</i>               | G 3131 A                    | Cryptic splice acceptor used; novel 8 amino acid insertion between amino acids 556 and 557                       |
| <i>mib-1(eb41)</i>   | 4.25 mM ENU    | F1            | <i>tDf7</i>               | G 83 A                      | G21D missense                                                                                                    |
| <i>mib-1(eb42)</i>   | 4.25 mM ENU    | F1            | <i>tDf7</i>               | T 1853 A                    | L292Q missense                                                                                                   |
| <i>mib-1(eb154)</i>  | CRISPR Cas9    | F2            | NA                        | deletes from -145 to 968    | 1,113 bp deletion; removes coding sequence for first 156 amino acids                                             |
| <i>mib-1(eb1s26)</i> | CRISPR Cas9    | F2            | NA                        | GFP insertion at 21         | 876 bp insertion of <i>gfp</i> plus three glycine codons before <i>mib-1</i> coding sequence                     |

<sup>1</sup>Tester refers to the *mib-1* affecting mutation used to select noncomplementing new alleles. <sup>2</sup>Nucleotide number is from the *mib-1* transcription start

**Supplemental Table 2**  
**Primers Used for PCR and CRISPR Genome Engineering**

| Primer         | 5' to 3' sequence                                      | Position in <i>mib-1</i>                                                                                    |
|----------------|--------------------------------------------------------|-------------------------------------------------------------------------------------------------------------|
| Fspe16C1Sal1   | GTTCGACATGAACGGAGTAGCTGGCGAATCG                        | 22 to 45 sense primer; <i>Sal</i> I restriction site                                                        |
| Rspe16C1BgIII  | AGATCTTCACGAGTAGATCGGCTGCATCGTC                        | 4,166 to 4,141 antisense primer; <i>Bg</i> III restriction site                                             |
| Rspe16NRFBgIII | AGATCTCGATCTTTGACATTCAAATCCGCTCC                       | 3,137 to 3,132 and 2,947 to 2,928 antisense primer; <i>Bg</i> III restriction site                          |
| MR83           | GCTTGTATCGATCGGCTTCTCGG                                | 1,948 to 1,970 sense primer                                                                                 |
| MR84           | CGCCATCATCATCGGCATCACCTG                               | 3,431 to 3,407 antisense primer                                                                             |
| MR100          | CGTTCGTCAATGTATTTTCAAGGCC                              | -2133 to -2105 sense primer                                                                                 |
| MR101          | AGTCGACCTGCAGGCATGCAAGCTC<br>GATTGCGCCAGCTACTCCGTTTCAT | 45 to 22 antisense primer; <i>pPD95.75 antisense primer</i> <sup>1</sup>                                    |
| MR102          | AGCTTGCATGCCTGCAGGTCTG                                 | NA; <i>pPD95.75 sense primer</i> <sup>1</sup>                                                               |
| MR103          | AAGGGCCCCGTACGGCCGACTA                                 | NA; <i>pPD95.75 antisense primer</i> <sup>1</sup>                                                           |
| TK287          | CGTCTACGCTGCTCTCATCCTTCA                               | NA; <i>rla-1 sense primer</i>                                                                               |
| TK288          | ATTCCTCCTTTGGCTCCTCCTTCTTCTT                           | NA; <i>rla-1 antisense primer</i>                                                                           |
| HL45           | GAGAGGAGTACACACCGGGGTT<br>TTAGAGCTAGAAATAGCAAGT        | -130 to -148 antisense guide sequence and forward Q5 for sgRNA <sup>2</sup>                                 |
| HL46           | ACCCGGGAGATTTCAGGTGGGTT<br>TTAGAGCTAGAAATAGCAAGT       | 952 to 970 guide sequence and forward Q5 for sgRNA <sup>2</sup>                                             |
| HL56           | ATTCGCATTAACCGCCGGGGTT<br>TTAGAGCTAGAAATAGCAAGT        | 984 to 968, -146 to -147 <i>mib-1(eb154)</i> antisense guide sequence and forward Q5 for sgRNA <sup>2</sup> |
| HL57           | TCCCCACTCGGCCACCCGGGGTT<br>TTAGAGCTAGAAATAGCAAGT       | -161 to -143 <i>mib-1(eb154)</i> sense guide sequence and forward Q5 for sgRNA <sup>2</sup>                 |

Some primers are bipartite, being complementary to *C. elegans* genomic DNA in one region and the insert within a plasmid or a restriction site in another region; *italic* text is used to differentiate these two template sources.

<sup>1</sup>Fire lab 1995 vector kit

<sup>2</sup> Dickinson, D. J., Ward, J. D., Reiner, D. J. and Goldstein, B. (2013). Engineering the *Caenorhabditis elegans* genome using Cas9-triggered homologous recombination. *Nature Methods* 10, 1028-1034.
